# Supplementary material for: The anti-leukemic activity of sodium dichloroacetate in p53mutated/null cells is mediated by a p53-independent ILF3/p21 pathway
Source: PubMed Central journal article supplement (PMC4385858; doi:10.18632/oncotarget.2960), 2014-12-10
Supplement: oncotarget-06-2385-s001.pdf [file oncotarget-06-2385-s001.pdf]

**The anti-leukemic activity of sodium dichloroacetate in p53<sup>mutated/null</sup> cells is mediated by a p53-independent ILF3/p21 pathway**

**Supplementary Material**

Supplementary Table 1: Differential expression data (as normalized spectral counts) for each identified protein whose abundance was significantly altered in HL-60 cells by DCA treatment

| Protein name                                                     | UniprotKB | HL-60 Untreated                     |                                     |                                     |                |                 |                  | HL-60 DCA30mM                       |                                     |                                     |                |                 |                  | Fold regulation <sup>g</sup> |
|------------------------------------------------------------------|-----------|-------------------------------------|-------------------------------------|-------------------------------------|----------------|-----------------|------------------|-------------------------------------|-------------------------------------|-------------------------------------|----------------|-----------------|------------------|------------------------------|
|                                                                  |           | 1R <sup>a</sup><br>NSC <sup>d</sup> | 2R <sup>b</sup><br>NSC <sup>d</sup> | 3R <sup>c</sup><br>NSC <sup>d</sup> | Average<br>NSC | SD <sup>e</sup> | %CV <sup>f</sup> | 1R <sup>a</sup><br>NSC <sup>d</sup> | 2R <sup>b</sup><br>NSC <sup>d</sup> | 3R <sup>c</sup><br>NSC <sup>d</sup> | Average<br>NSC | SD <sup>e</sup> | %CV <sup>f</sup> |                              |
| ADP/ATP translocase 2 (ANT2)                                     | P05141    | 26                                  | 35                                  | 37                                  | 32.67          | 5.86            | 17.94            | 1                                   | 1                                   | 1                                   | 1.00           | 0.00            | 0.00             | -32.67                       |
| ADP-ribosylation factor 4                                        | P18085    | 1                                   | 1                                   | 1                                   | 1.00           | 0.00            | 0.00             | 6                                   | 6                                   | 5                                   | 5.67           | 0.58            | 10.19            | 5.67                         |
| ADP-ribosylation factor 5                                        | P84085    | 1                                   | 1                                   | 1                                   | 1.00           | 0.00            | 0.00             | 8                                   | 8                                   | 6                                   | 7.33           | 1.15            | 15.75            | 7.33                         |
| Asparagine-tRNA ligase, cytoplasmic                              | O43776    | 4                                   | 4                                   | 5                                   | 4.33           | 0.58            | 13.32            | 17                                  | 20                                  | 21                                  | 19.33          | 2.08            | 10.77            | 4.46                         |
| Endoplasmic reticulum resident protein 44                        | Q9BS26    | 9                                   | 7                                   | 7                                   | 7.67           | 1.15            | 15.06            | 2                                   | 1                                   | 3                                   | 2.00           | 1.00            | 50.00            | -3.83                        |
| Eukaryotic translation initiation factor 2 subunit 3             | P41091    | 3                                   | 2                                   | 2                                   | 2.33           | 0.58            | 24.74            | 5                                   | 9                                   | 9                                   | 7.67           | 2.31            | 30.12            | 3.29                         |
| Glycine-tRNA ligase                                              | P41250    | 1                                   | 1                                   | 1                                   | 1.00           | 0.00            | 0.00             | 9                                   | 10                                  | 11                                  | 10.00          | 1.00            | 10.00            | 10.00                        |
| Growth factor receptor-bound protein 2                           | P62993    | 7                                   | 6                                   | 7                                   | 6.67           | 0.58            | 8.66             | 1                                   | 1                                   | 1                                   | 1.00           | 0.00            | 0.00             | -6.67                        |
| Histidine--tRNA ligase, cytoplasmic                              | P12081    | 5                                   | 6                                   | 8                                   | 6.33           | 1.53            | 24.12            | 1                                   | 1                                   | 1                                   | 1.00           | 0.00            | 0.00             | -6.33                        |
| Histone H3.1                                                     | P68431    | 1                                   | 1                                   | 1                                   | 1.00           | 0.00            | 0.00             | 8                                   | 7                                   | 4                                   | 6.33           | 2.08            | 32.87            | 6.33                         |
| Histone H3.2                                                     | Q71DI3    | 1                                   | 1                                   | 1                                   | 1.00           | 0.00            | 0.00             | 8                                   | 5                                   | 5                                   | 6.00           | 1.73            | 28.87            | 6.00                         |
| Interleukin enhancer-binding factor 3                            | Q12906    | 1                                   | 3                                   | 1                                   | 1.67           | 1.15            | 69.28            | 11                                  | 7                                   | 5                                   | 7.67           | 3.06            | 39.85            | 4.60                         |
| NAD(P) transhydrogenase, mitochondrial (NNT)                     | Q13423    | 1                                   | 1                                   | 1                                   | 1.00           | 0.00            | 0.00             | 5                                   | 9                                   | 8                                   | 7.33           | 2.08            | 28.39            | 7.33                         |
| Prothymosin alpha                                                | P06454    | 1                                   | 1                                   | 1                                   | 1.00           | 0.00            | 0.00             | 8                                   | 17                                  | 17                                  | 14.00          | 5.20            | 37.12            | 14.00                        |
| Ribonucleoside-diphosphate reductase large subunit               | P23921    | 9                                   | 13                                  | 11                                  | 11.00          | 2.00            | 18.18            | 4                                   | 4                                   | 3                                   | 3.67           | 0.58            | 15.75            | -3.00                        |
| Serine/threonine-protein phosphatase PP1-alpha catalytic subunit | P62136    | 14                                  | 12                                  | 12                                  | 12.67          | 1.15            | 9.12             | 9                                   | 1                                   | 1                                   | 3.67           | 4.62            | 125.97           | -3.45                        |
| Tubulin-tyrosine ligase-like protein 12                          | Q14166    | 9                                   | 10                                  | 8                                   | 9.00           | 1.00            | 11.11            | 2                                   | 4                                   | 3                                   | 3.00           | 1.00            | 33.33            | -3.00                        |

<sup>a</sup>,first replicate; <sup>b</sup>,second replicate; <sup>c</sup>,third replicate; <sup>d</sup>,number of normalized spectral counts (NSC); <sup>e</sup>,standard deviation of the averaged NSC; <sup>f</sup>,coefficient of variation (CV%); <sup>g</sup>,fold regulation in expression HL60 DCA treated cells vs non-treated cells.

Supplementary Table 2. Proteins significantly altered (OPLS-DA, Mann-Whitney,  $p < 0,05$ ) in HL-60 cells after DCA treatment

| Description                                                      | Accession Number | UniProtKB | Fold regulation |
|------------------------------------------------------------------|------------------|-----------|-----------------|
| ADP/ATP translocase 2 (ANT2)                                     | ADT2_HUMAN       | P05141    | -32.67          |
| ADP-ribosylation factor 4                                        | ARF4_HUMAN       | P18085    | 5.67            |
| ADP-ribosylation factor 5                                        | ARF5_HUMAN       | P84085    | 7.33            |
| Asparagine-tRNA ligase, cytoplasmic                              | SYNC_HUMAN       | O43776    | 4.46            |
| Endoplasmic reticulum resident protein 44                        | ERP44_HUMAN      | Q9BS26    | -3.83           |
| Eukaryotic translation initiation factor 2 subunit 3             | IF2G_HUMAN       | P41091    | 3.29            |
| Glycine-tRNA ligase                                              | SYG_HUMAN        | P41250    | 10.00           |
| Growth factor receptor-bound protein 2                           | GRB2_HUMAN       | P62993    | -6.67           |
| Histidine-tRNA ligase, cytoplasmic                               | SYHC_HUMAN       | P12081    | -6.33           |
| Histone H3.1                                                     | H31_HUMAN        | P68431    | 6.33            |
| Histone H3.2                                                     | H32_HUMAN        | Q71DI3    | 6.00            |
| Interleukin enhancer-binding factor 3                            | ILF3_HUMAN       | Q12906    | 4.60            |
| NAD(P) transhydrogenase, mitochondrial (NNT)                     | NNTM_HUMAN       | Q13423    | 7.33            |
| Prothymosin alpha                                                | PTMA_HUMAN       | P06454    | 14.00           |
| Ribonucleoside-diphosphate reductase large subunit               | RIR1_HUMAN       | P23921    | -3.00           |
| Serine/threonine-protein phosphatase PP1-alpha catalytic subunit | PP1A_HUMAN       | P62136    | -3.45           |
| Tubulin-tyrosine ligase-like protein 12                          | TTL12_HUMAN      | Q14166    | -3.00           |

Data report proteins differentially modulated (above the cutoff of 3 fold of induction or below the cutoff of -3 fold of reduction) after DCA 30mM treatment in HL-60 cells.

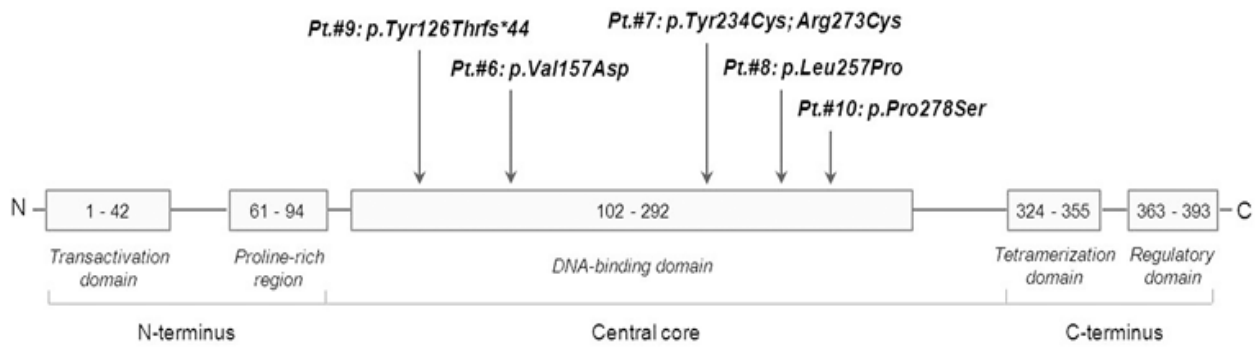

Supplementary Figure 1: Sites of mutation in p53 in the B-CLL patients investigated. A schematic representation of the 393 amino acid domain structure of human p53 is shown. The sites of the mutations detected in the B-CLL patients (Pt.#6-10) are indicated. The nomenclature follows the current HGVS recommendations for the description of sequence variants.

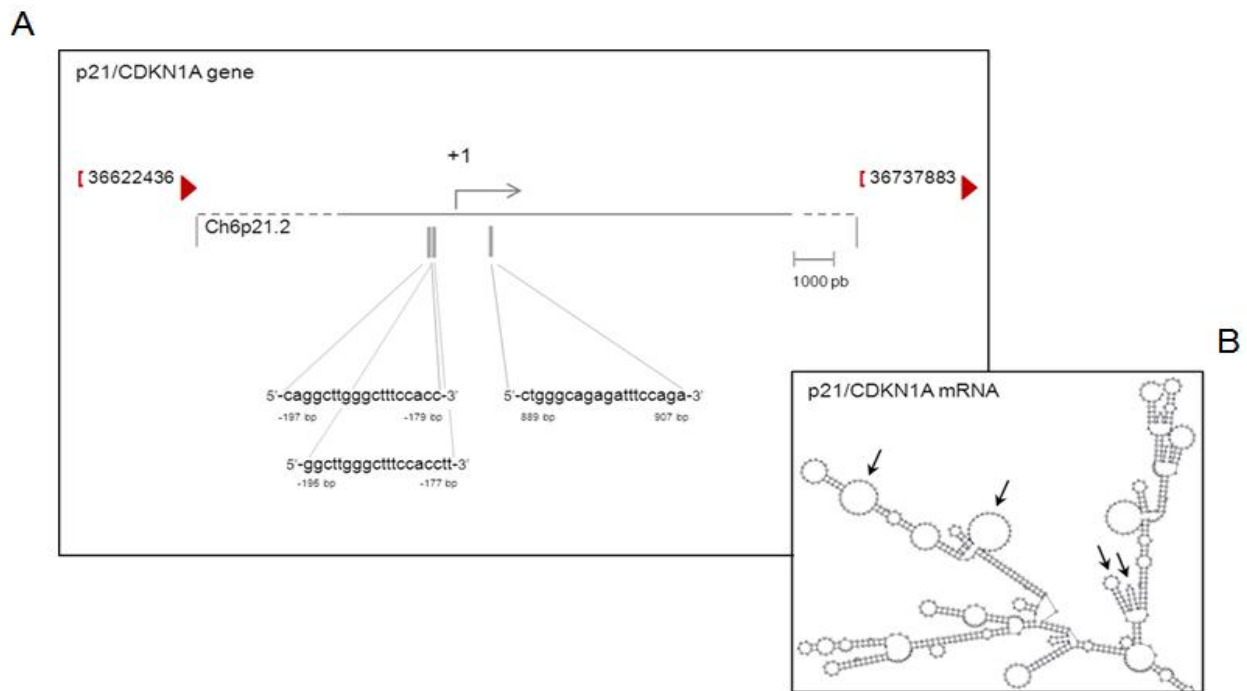

Supplementary Figure 2: Mechanisms of p21/CDKN1A gene regulation by ILF3. Schematic representation of the predicted ILF3 binding sites on the regulatory region of the human p21/CDKN1A gene (A) and on the p21 mRNA 3'-UTR secondary structure (B), supporting the transcriptional and post-transcriptional regulation of p21/CDKN1A by ILF3. In A, the purine-rich NF-AT/ILF3 binding sites, predicted by computational analysis (MatInspector analyses of Genomatix), are evidenced in the regulatory region of the human p21/CDKN1A gene. In B, mRNA 3'-UTR secondary structure analysis (RNA fold program from the Vienna RNA Package) of a partial region of p21/CDKN1A is represented; arrows indicate the AU-rich elements in the sequence recognized by ILF3, involved in the stabilization of p21 mRNA.

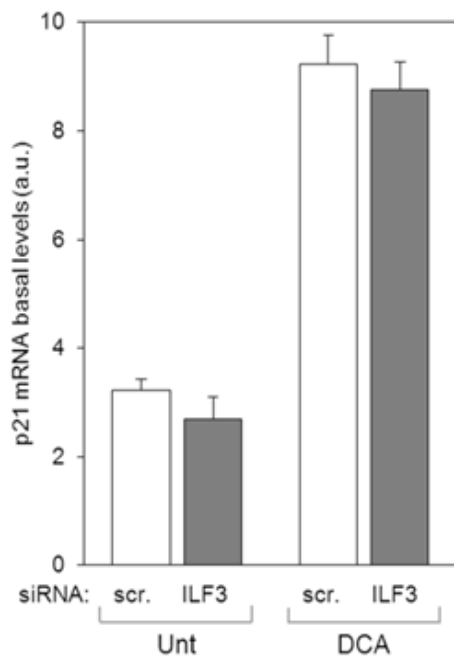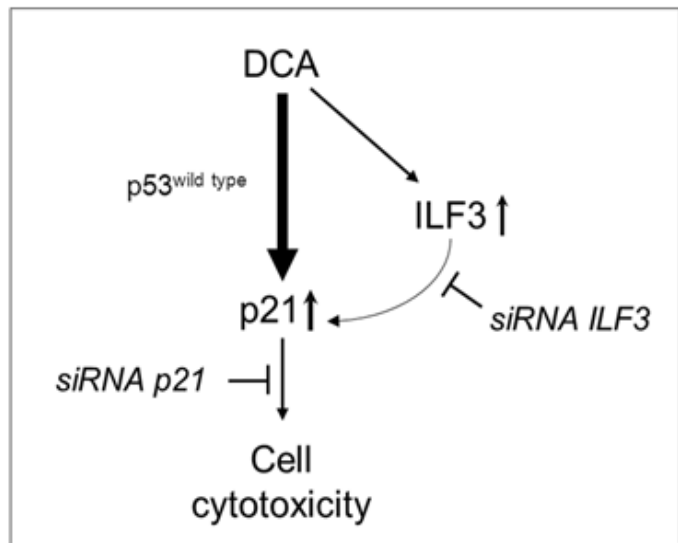

Supplementary Figure 3: Analysis of the DCA-ILF3-p21 axis in p53<sup>wild-type</sup> leukemic cells. In A, p53<sup>wild-type</sup> JVM-2 cells were transfected with either control scrambled (scr) siRNA or ILF3 siRNA, before treatment with DCA (30 mM). Upon ILF3 silencing, levels of p21 mRNA were assessed by quantitative RT-PCR, both in untreated and DCA treated cells. Data are expressed as arbitrary units (a.u.) and reported as means±SD of results from three independent experiments, each performed in duplicate. In B, a schematic representation of the hypothetical p53-dependent and p53-independent pathways mediating the p21 modulation in response to DCA.
